# Supplementary material for: Sex specific regulation of TSPY-Like 2 in the DNA damage response of cancer cells
Source: PubMed Central journal article supplement (PMC10015022; doi:10.1038/s41419-023-05722-2), 2023-03-15
Supplement: 41419_2023_5722_MOESM1_ESM.pdf [file 41419_2023_5722_MOESM1_ESM.pdf]

## **SUPPLEMENTARY FIGURE LEGENDS:**

**Supplementary Fig. 1.** **A)** Western blot analysis of cleaved-PARP-1, p53 and  $\gamma$ -H2AX protein levels in U2OS cells in untreated condition and after 1, 3, 6, 18 and 24 hrs of etoposide. **B)** Scatter plot shows the mean intensity of TSPYL2 in U2OS nuclei in unstressed condition and after etoposide treatment. Average  $\pm$  S.E.M are indicated in red. P-value was calculated using Student's t-test. **C)** Proliferation rate analyses of the indicated cancer cell lines. No statistically significant difference among the cell lines was found according to ANOVA test. **D)** Cell cycle profile analyses by flow cytometry of the indicated cancer cell lines. **E)** Western blot analysis of TSPYL2 levels in different human cancer cell lines in untreated conditions. **F)** Examples of EdU and TSPYL2 staining in untreated and etoposide treated cells. **G)** Chart representing the percentage of EdU positive and negative cells with accumulated TSPYL2 after etoposide treatment. **H)** Immunofluorescence staining of TSPYL2 and  $\gamma$ -H2AX in untreated and etoposide treated U2OS cells.

**Supplementary Fig. 2.** **A)** The MA0024.3 matrix of the JASPAR CORE database (left) and visualization of E2F1 binding site position between -164bp and -176bp from the TSPYL2 ATG start site (right). **B)** E2F1 binding site on TSPYL2 promoter is conserved among species. **C)** Western blot analysis of ectopic E2F1 levels upon etoposide treatment in U2OS cells transfected with MOCK and FLAG-E2F1 expression vectors, used for luciferase assays.

**Supplementary Fig. 3.** Western blot analysis of TSPYL2 levels in MG-63 (left) and A549 (right) cells treated with MG-132 for 8 hrs, in untreated and etoposide-treated conditions.

**Supplementary Fig. 4.** **A)** Western blot analysis of cleaved PARP-1 and acetylated-p53 levels after etoposide treatment for 24 and 48 hrs, in TSPYL2 depleted U2OS and **B)** MG-63 cells.

**Supplementary Fig. 5.** **A)** TCGA data available for TSPYL2 gene according to the sex in different cancer types. **B)** Types and distribution of TSPYL2 mutations in the different cancer cases of the TCGA database. **C)** Mutations localization along TSPYL2 protein in all, sex-related and somatic tumors. **D)** Kaplan-Meier plots showing the percentage of patients who are alive at a time point in different sex specific tumors according to TSPYL2 expression level (high in red and low in blue). **E)** Kaplan-Meier plots, obtained from “The Human Protein Atlas” web site, summarizing the prognostic role of TSPYL2.

### **Supplementary Table I**

List of the tumor types investigated during TCGA data analyses aimed at the identification of TSPYL2 mutations.

# Supplementary Figure 1

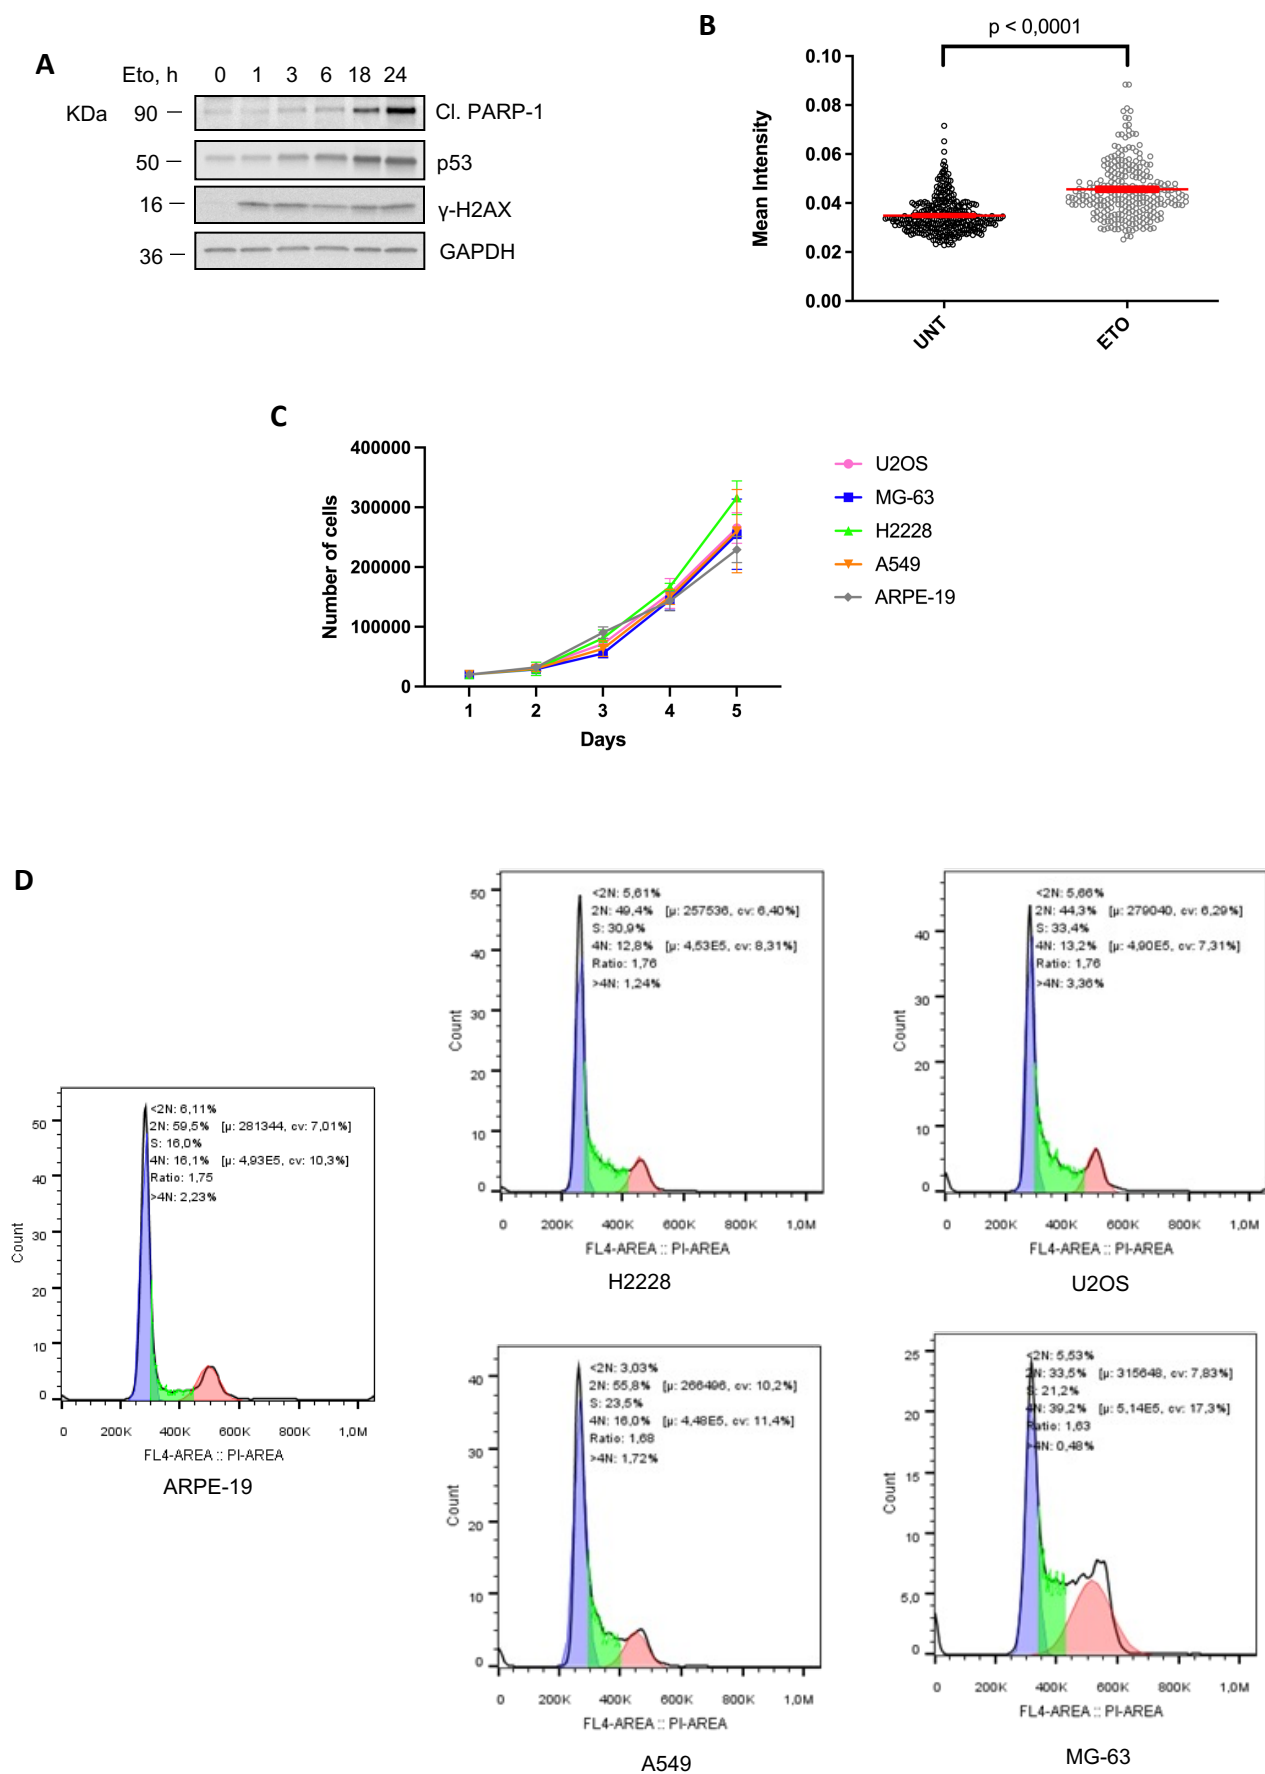

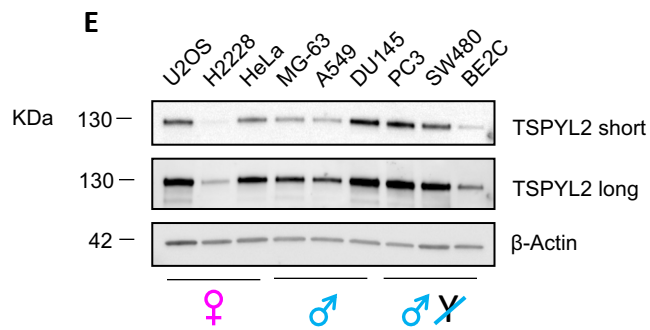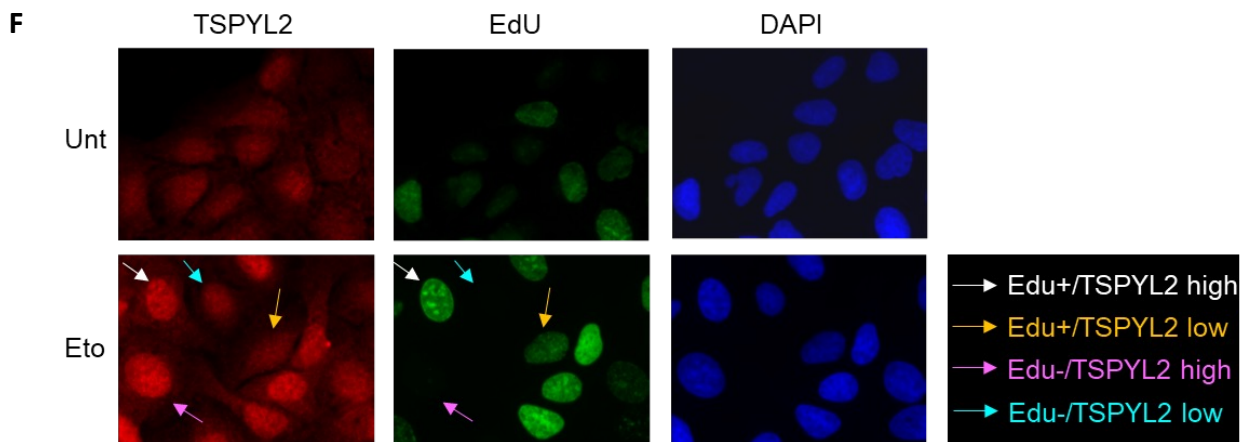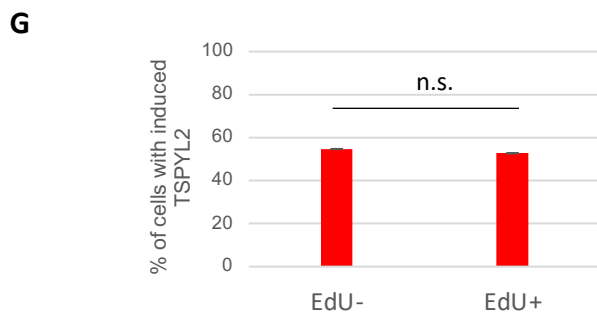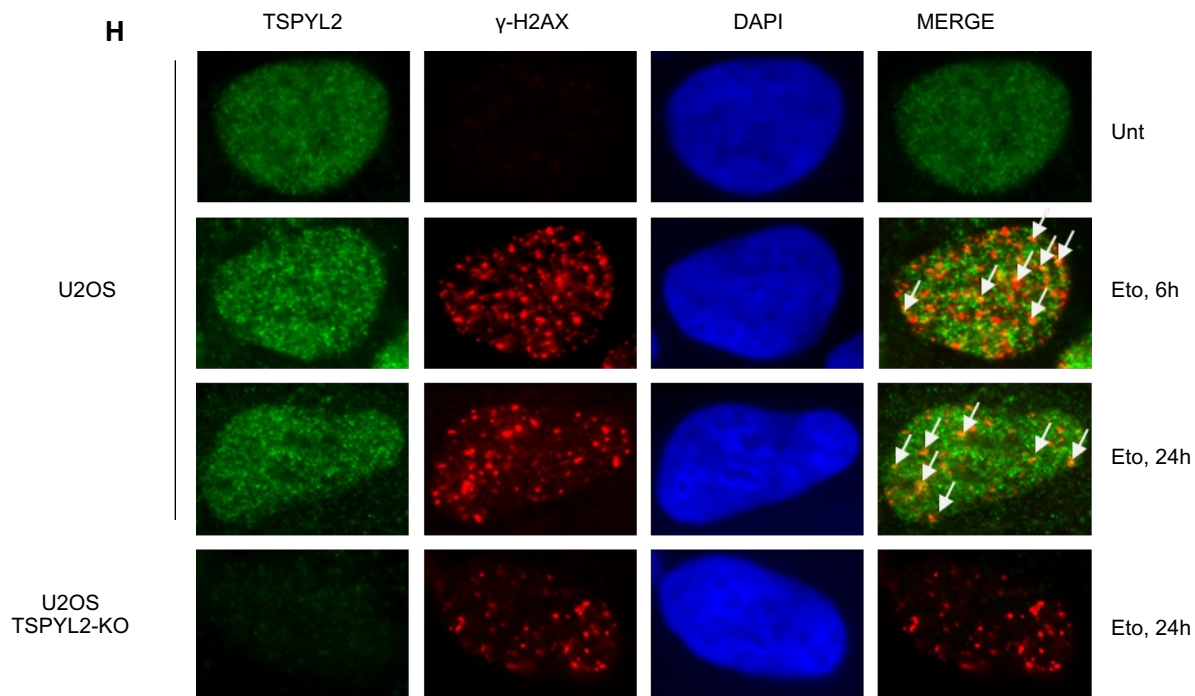

# Supplementary Figure 2

**A** E2F1 JASPAR\_CORE\_2016,MA0024.3,MA0024.3

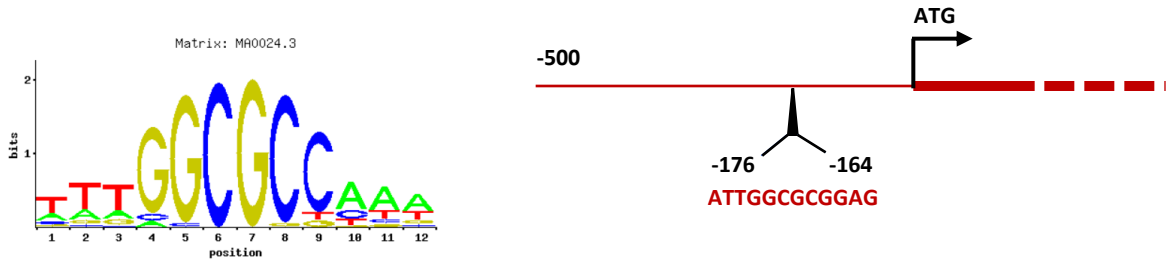

**B**

|                   |                                |                    |       |    |
|-------------------|--------------------------------|--------------------|-------|----|
| human/1-35        | 1 aggagtgggcggggccttcggcg      | a-ttggcgcggg       | -ag-g | 35 |
| orangutan/1-35    | 1 aggagtgggcggggccttcggcg      | a-ttggcgcggg       | -ag-g | 35 |
| rhesus/1-35       | 1 aggagcgggcggggccttcggcg      | a-ttggcgcggg       | -ag-g | 35 |
| baboon/1-35       | 1 aggagcgggcggggccttcggcg      | a-ttggcgcggg       | -ag-g | 35 |
| marmoset/1-35     | 1 aggagggggcggggccttcagcg      | a-ttggcgcggg       | -ag-g | 35 |
| bushbaby/1-30     | 1 agaag-gggcggggccttcggcta     | - - - - agcca-ca-g |       | 30 |
| treeshrew/1-36    | 1 aggagtgggcggggccttcggcgg     | -attggcgcggg       | -agag | 36 |
| mouse/1-35        | 1 gggagtgggcggggccttcggcga     | -taggcctg-tg-g     |       | 35 |
| guinea-pig/1-35   | 1 aagagtgggcggggccttcggcaa     | -ttggcgcggg        | -ag-g | 35 |
| kangaroo-rat/1-35 | 1 aggagtgggcggggccttcagagg     | -ctggcgcggg        | -ag-g | 35 |
| pika/1-35         | 1 acgagtgggcgggatctctacga      | -ttggcgcggg        | -ag-g | 35 |
| rabbit/1-35       | 1 aggagtgggcggggacctcgacga     | -ttggcgcggg        | -ag-g | 35 |
| alpaca/1-33       | 1 -gcagggggcgggtgccca-gg       | cg-ttggcgcggg      | -ag-g | 33 |
| cow/1-33          | 1 -tgagggggcggggcct-gacga      | -ttggcgcggg        | -ag-g | 33 |
| dolphin/1-34      | 1 gcgagggggcggggctt-ggcgc      | -ttggcgcggg        | -ag-g | 34 |
| cat/1-35          | 1 cggagagggcggggccttcgacgc     | -ttggcgcggg        | -ag-g | 35 |
| dog/1-35          | 1 gggagggggcgggtcctgggcgc      | -ttggcgcggg        | -ag-g | 35 |
| horse/1-33        | 1 gggagagggaggg-ccgggcgc       | -ttggcgcggg        | -ag-g | 33 |
| microbat/1-34     | 1 gcg-aggggcgggaccgagcag       | -ttggcgcggg        | -ag-g | 34 |
| megabat/1-31      | 1 gggaaagggacgggacctgggc-      | -tcggcgcg--g-g     |       | 31 |
| hedgehog/1-35     | 1 gaggaagggaggggccggcgcct      | -ttggcgcggg        | -ag-g | 35 |
| elephant/1-35     | 1 gggtgggggcgggacattggcgcg     | -ttggcgcggg        | -ag-g | 35 |
| rock-hyrax/1-35   | 1 gggagggggcgggacgttggcgg      | -ttggcgcggg        | -ag-g | 35 |
| armadillo/1-34    | 1 - - - agagggcgggaaaccttcgcgg | -attggcgcggg       | -ag-g | 34 |

**C**

|           |    |   |   |   |         |
|-----------|----|---|---|---|---------|
| MOCK      | +  | - | + | - |         |
| FLAG-E2F1 | -  | + | - | + |         |
| KDa       | 60 | - |   |   | FLAG    |
|           | 42 | - |   |   | β-actin |
| Eto       | -  | - | + | + |         |

## Supplementary Figure 3

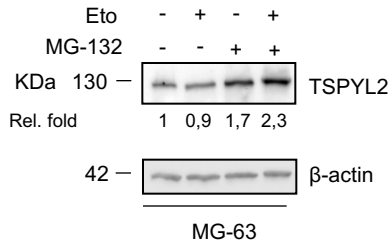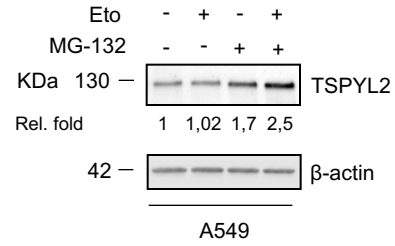

## Supplementary Figure 4

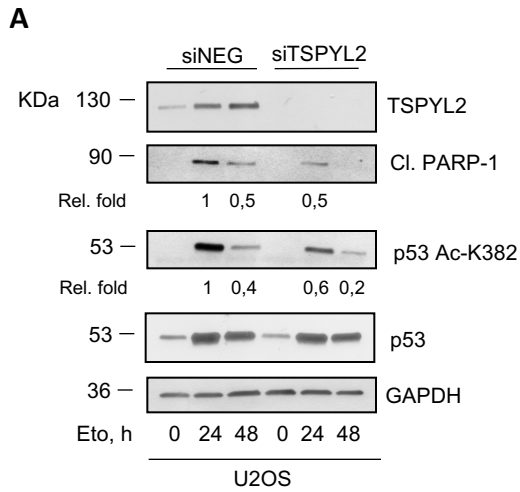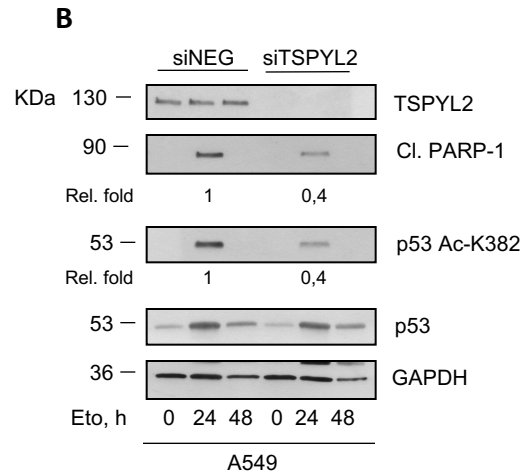

# Supplementary Figure 5

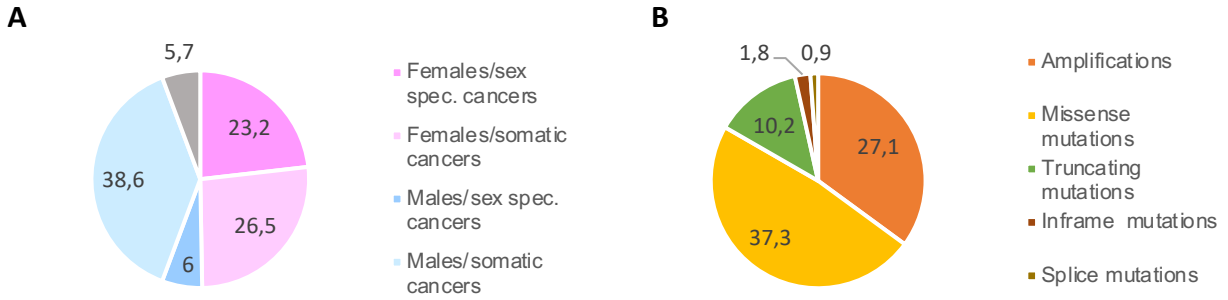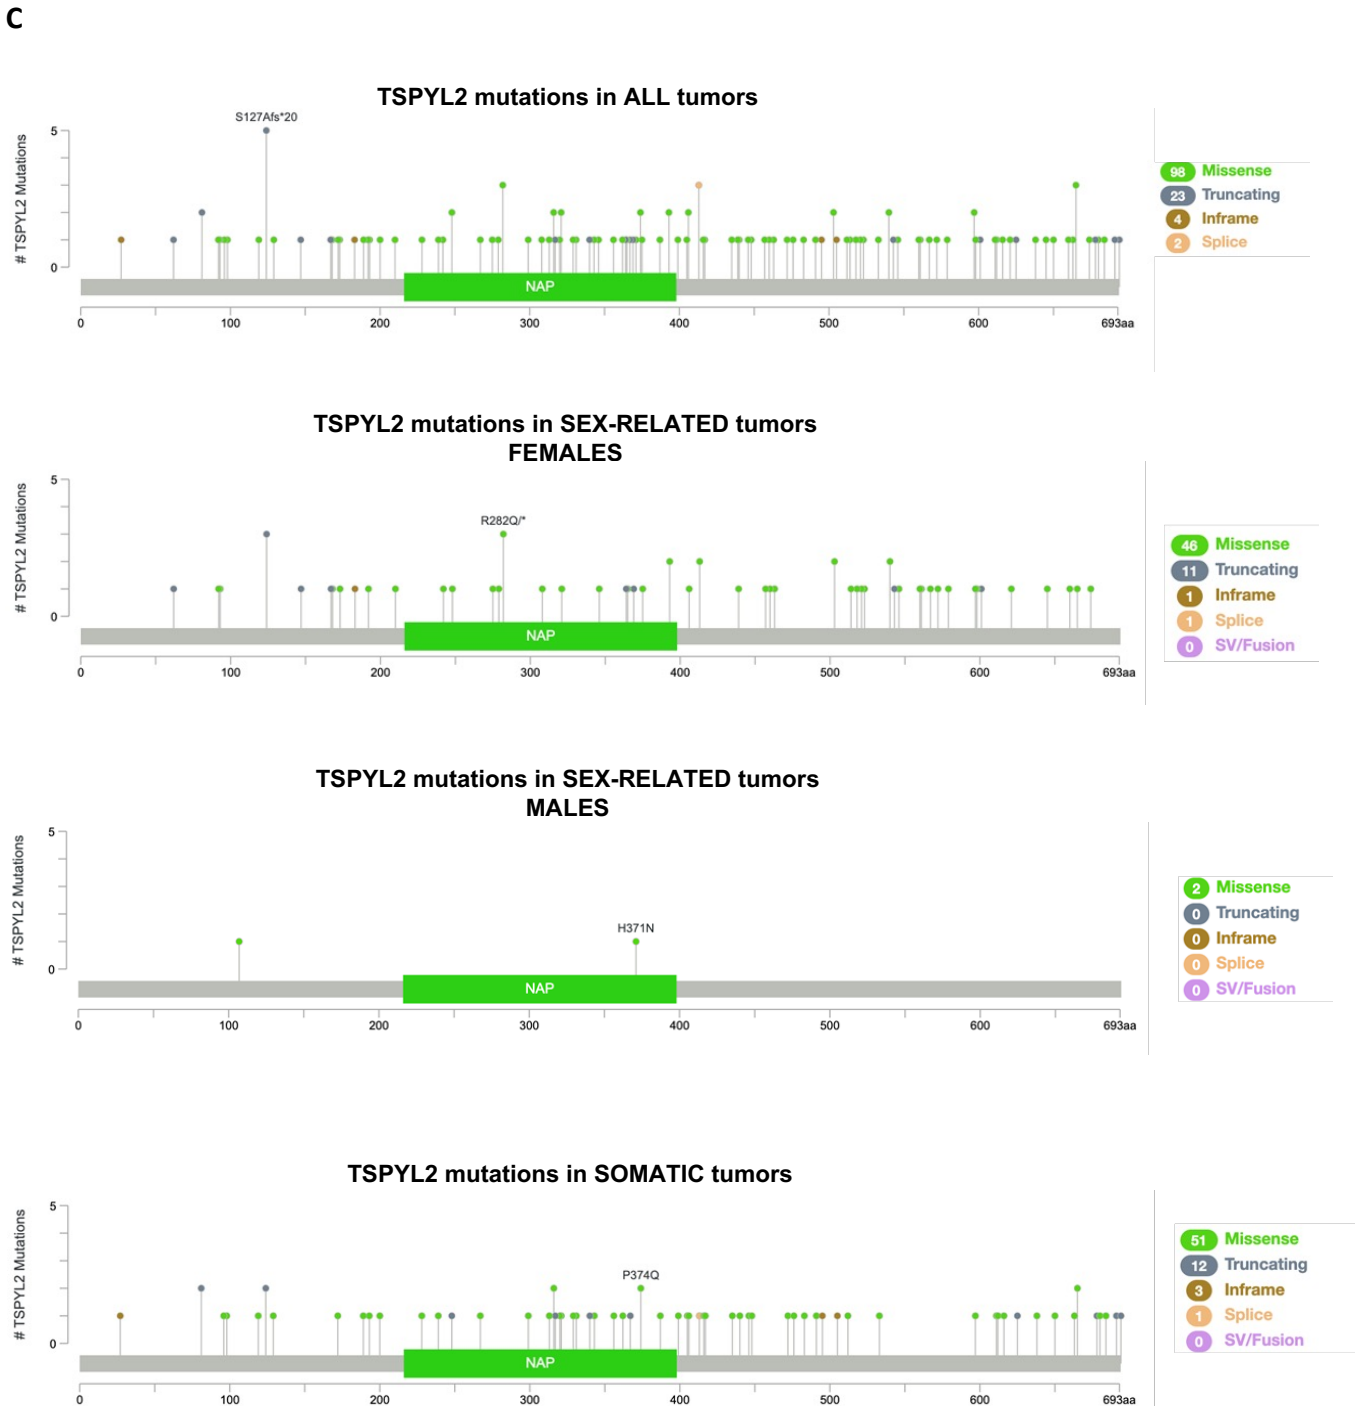

**D**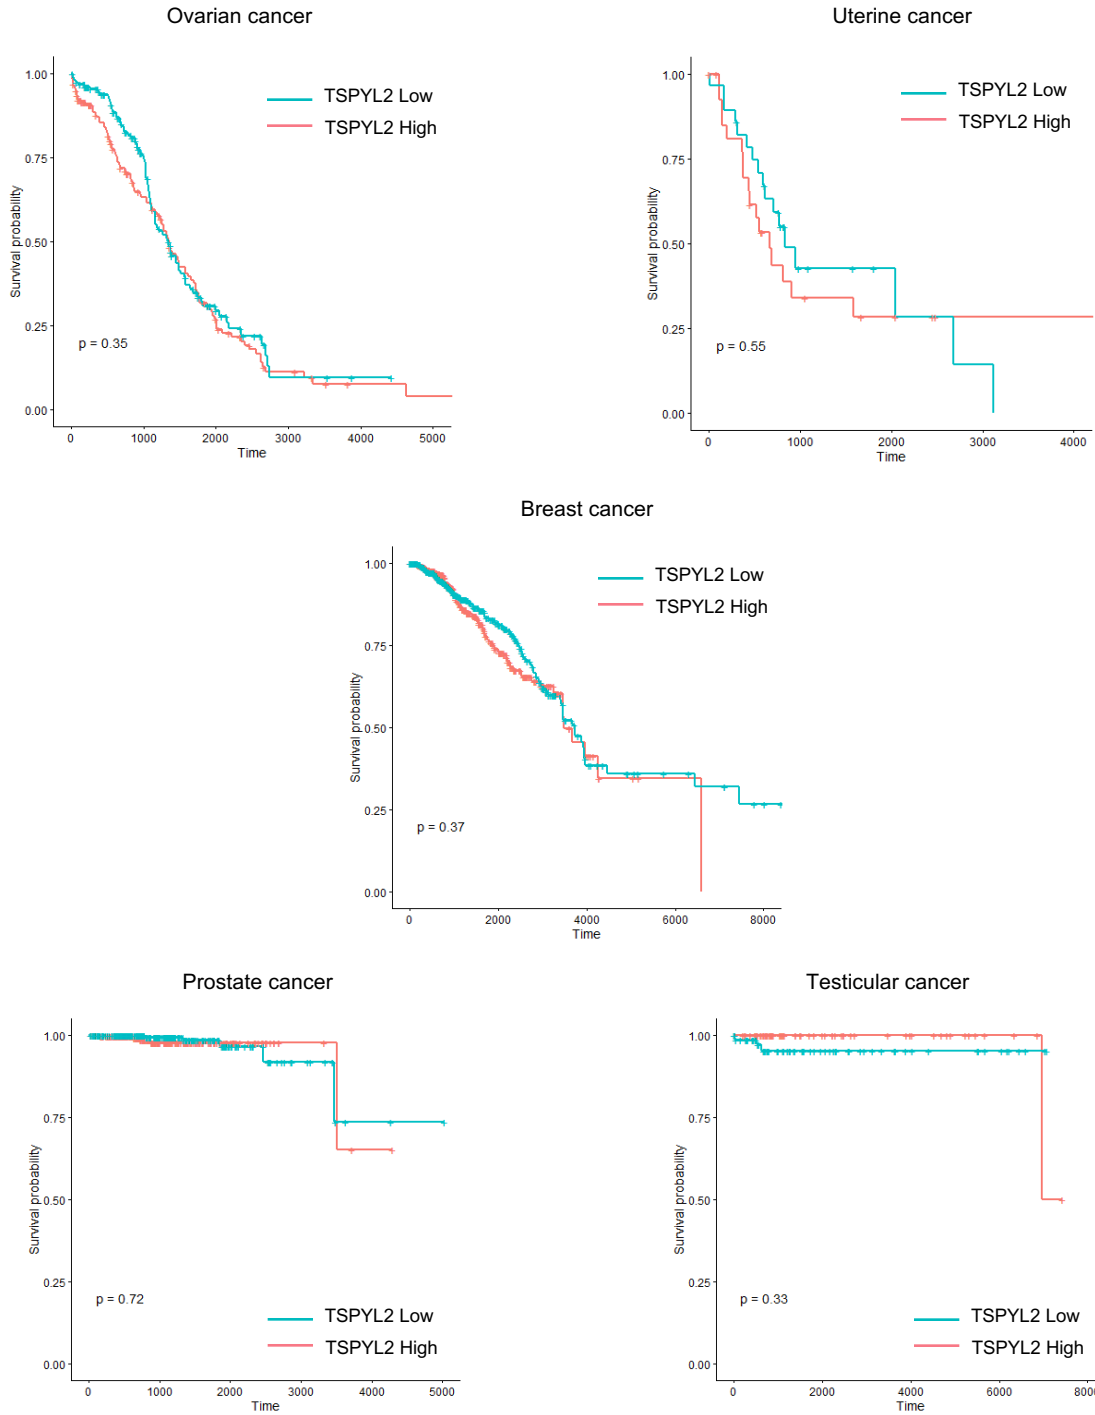**E**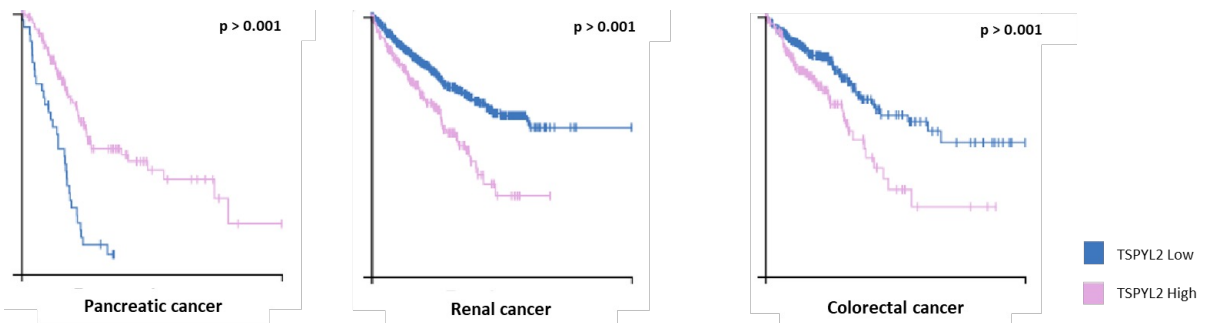



## Supplementary Table I

| SEX-RELATED TUMORS                |                             | SOMATIC TUMORS                        |
|-----------------------------------|-----------------------------|---------------------------------------|
| FEMALE                            | MALE                        |                                       |
| Cervical Squamous Cell Carcinoma  | Prostate Adenocarcinoma     | Acute Myeloid Leukemia                |
| Ovarian Serous Cystadenocarcinoma | Testicular Germ Cell Tumors | Adrenocortical Carcinoma              |
| Uterine Carcinoma                 |                             | Bladder Urothelial Carcinoma          |
| Breast Invasive Carcinoma         |                             | Brain Lower Grade Glioma              |
|                                   |                             | Cholangiocarcinoma                    |
|                                   |                             | Colorectal Adenocarcinoma             |
|                                   |                             | Diffuse Large B-Cell Lymphoma         |
|                                   |                             | Esophageal Carcinoma                  |
|                                   |                             | Glioblastoma Multiforme               |
|                                   |                             | Head and Neck Squamous Cell Carcinoma |
|                                   |                             | Kidney Carcinoma                      |
|                                   |                             | Liver Carcinoma                       |
|                                   |                             | Lung Carcinoma                        |
|                                   |                             | Mesothelioma                          |
|                                   |                             | Pancreatic Adenocarcinoma             |
|                                   |                             | Pheochromocytoma and Paranglioma      |
|                                   |                             | Sarcoma                               |
|                                   |                             | Melanoma                              |
|                                   |                             | Stomach Adenocarcinoma                |
|                                   |                             | Thymoma                               |
|                                   |                             | Thyroid Carcinoma                     |
