# Supplementary material for: Sex specific regulation of TSPY-Like 2 in the DNA damage response of cancer cells
Source: PubMed Central journal article supplement (PMC10015022; doi:10.1038/s41419-023-05722-2), 2023-03-15
Supplement: 41419_2023_5722_MOESM2_ESM.pdf [file 41419_2023_5722_MOESM2_ESM.pdf]

Fig. 1B

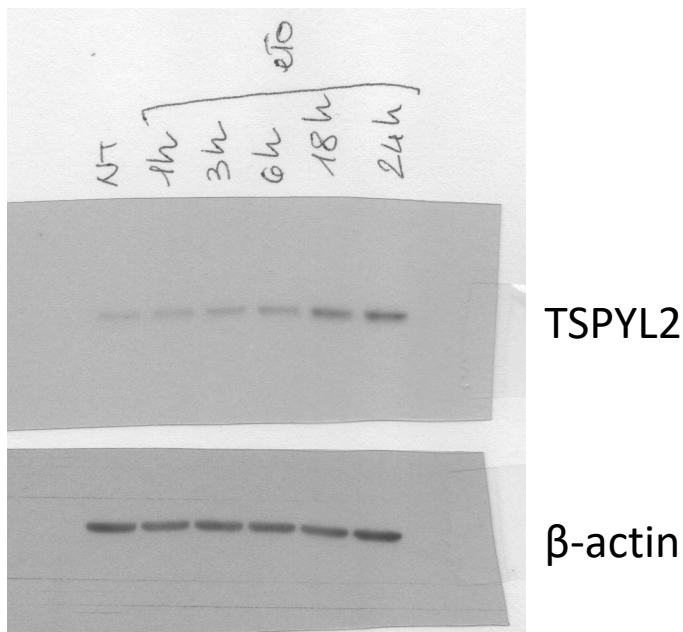

Fig. 1D top

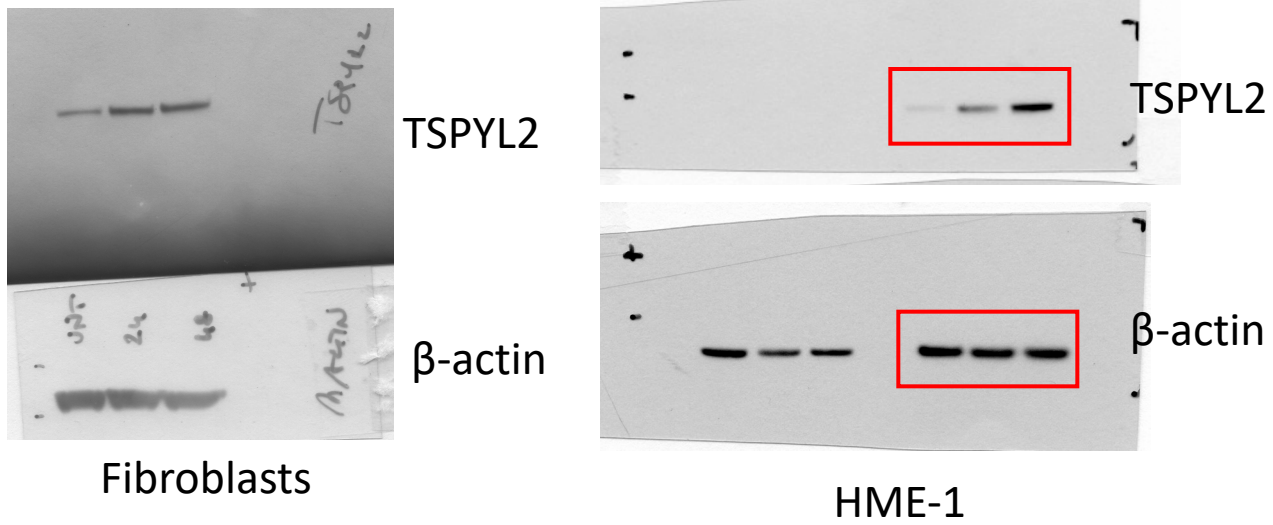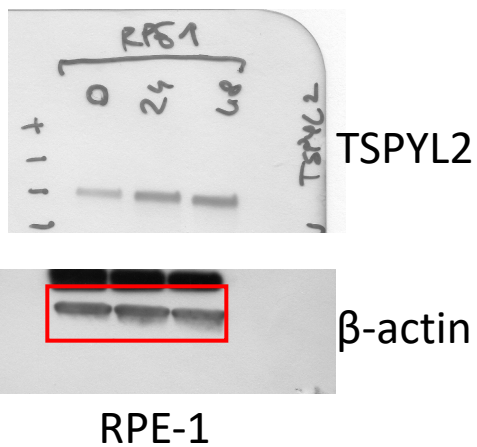

Fig. 1D bottom

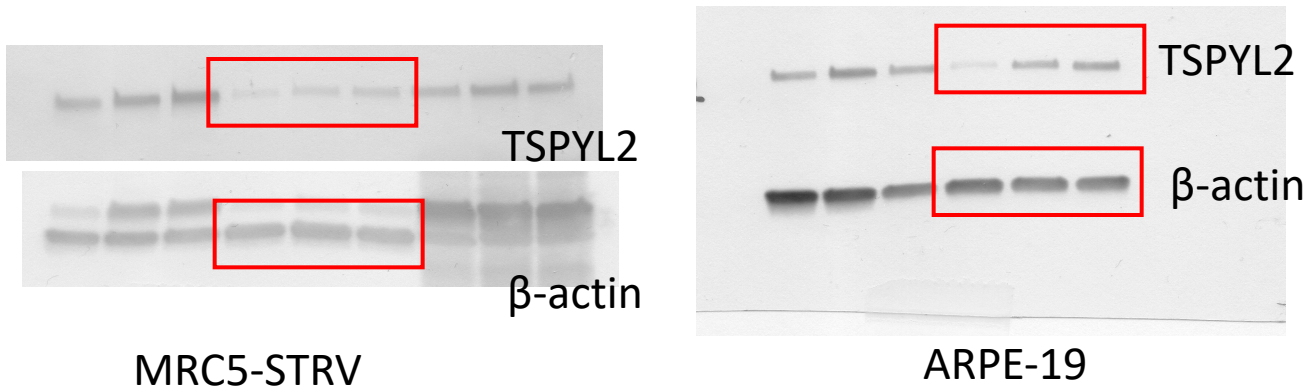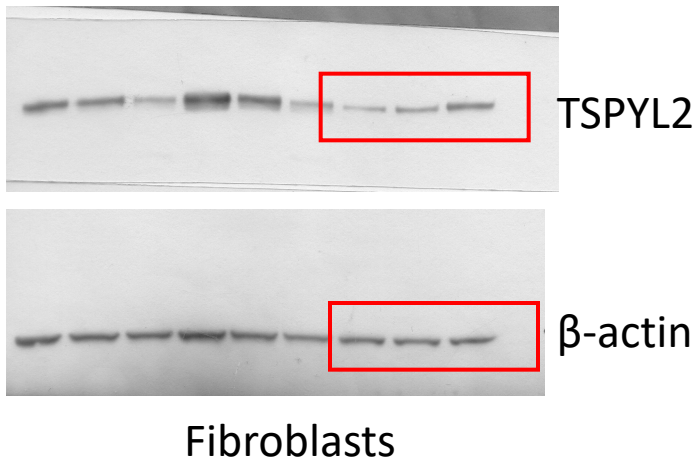

Fig. 1E

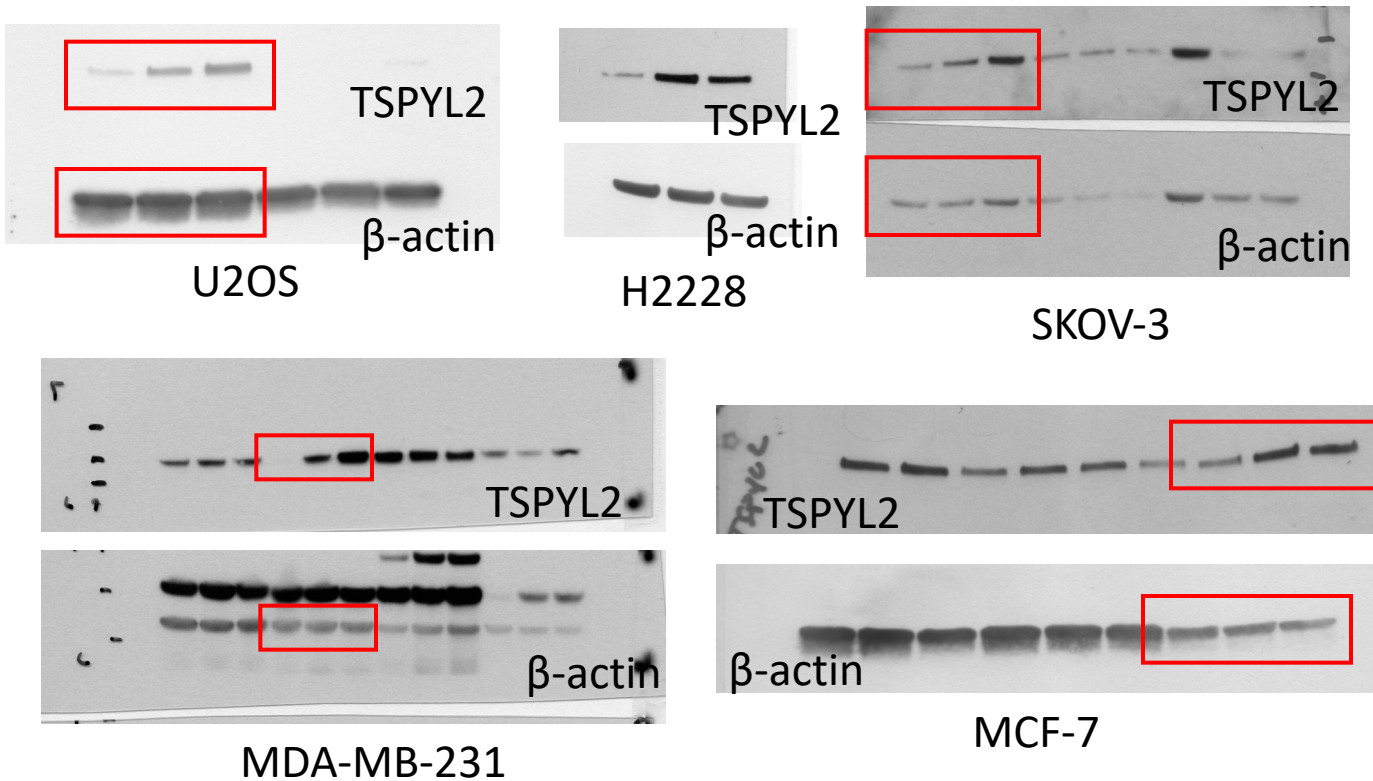

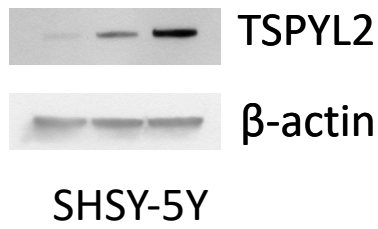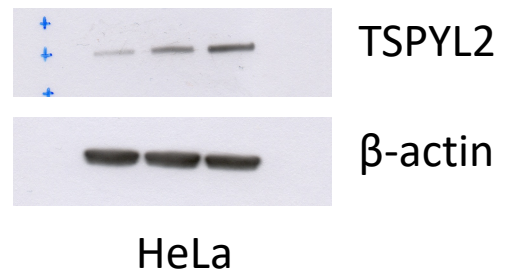

Fig. 1F

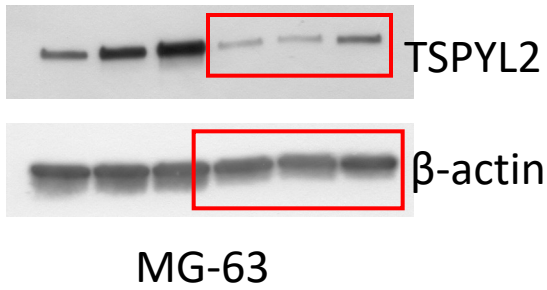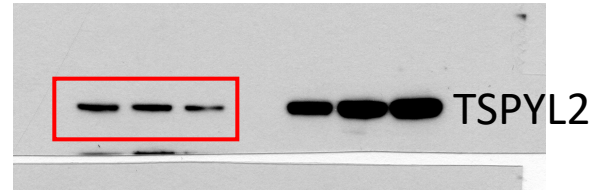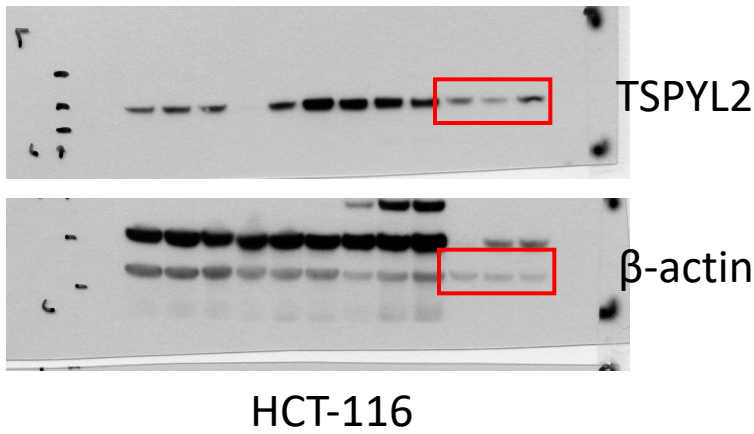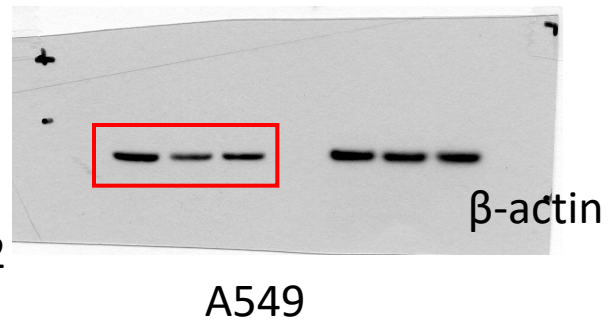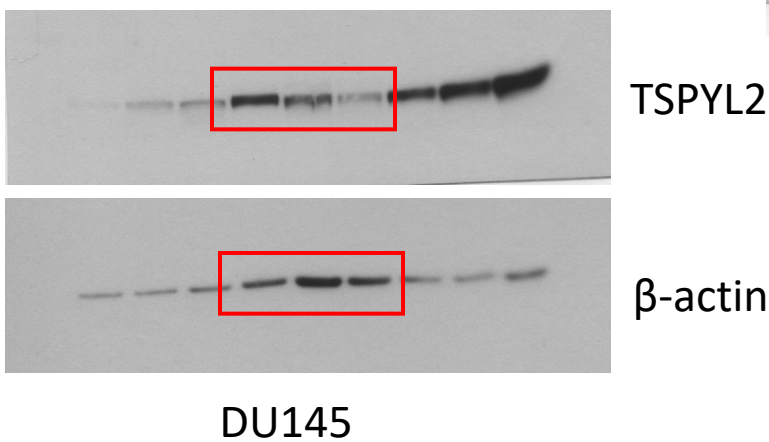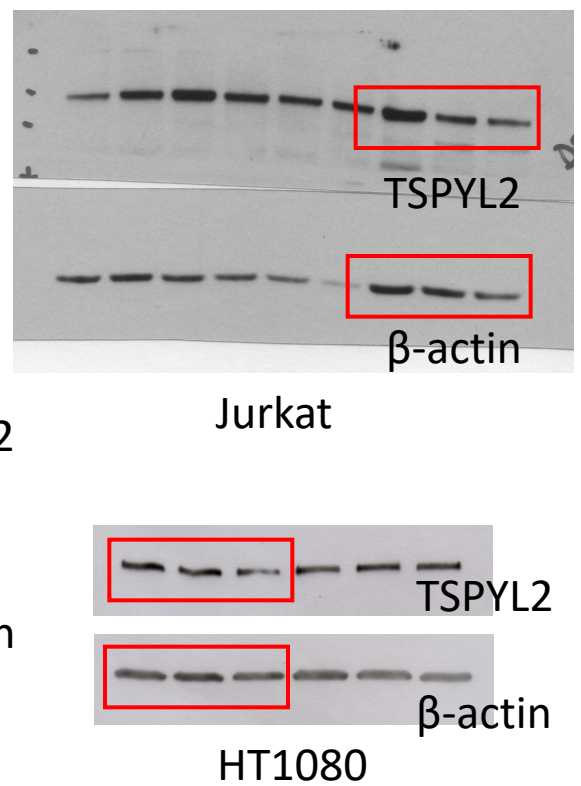

Fig. 1G

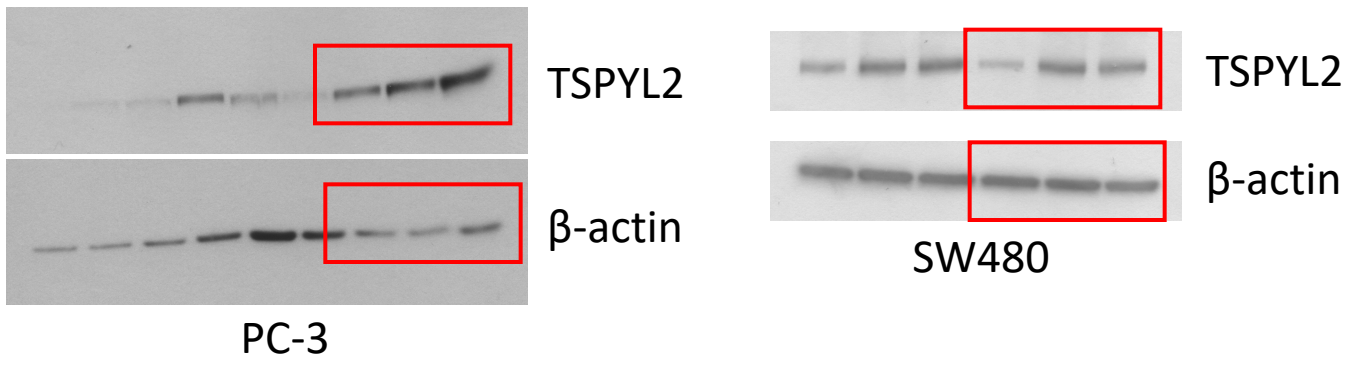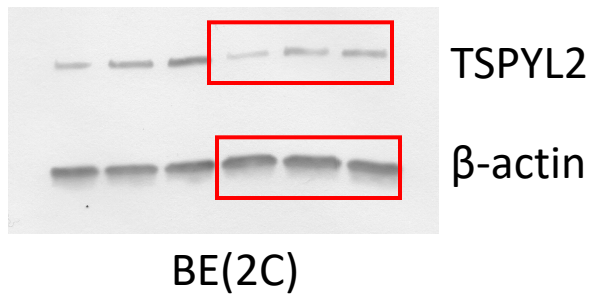

Fig. 1H

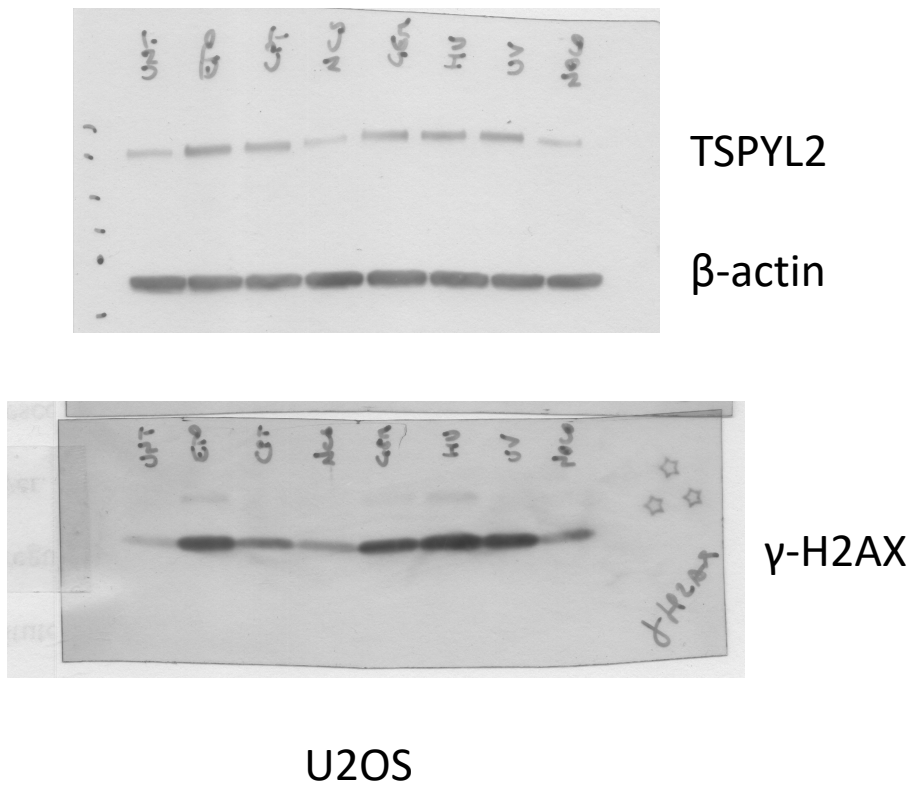

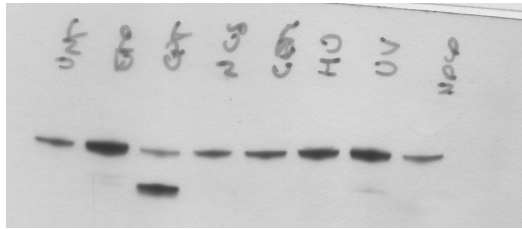

TSPYL2

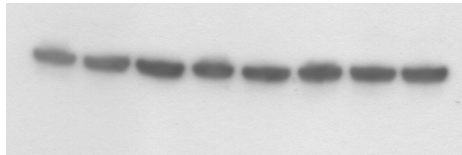

$\beta$ -actin

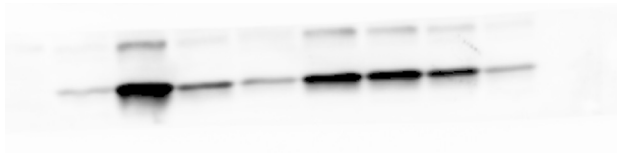

$\gamma$ -H2AX

SW480

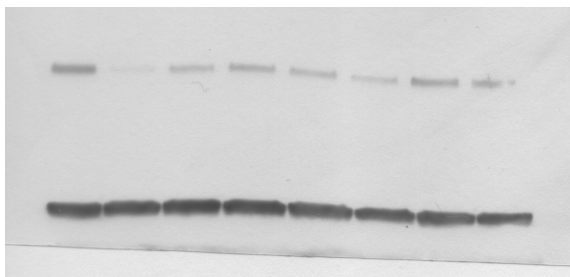

TSPYL2

$\beta$ -actin

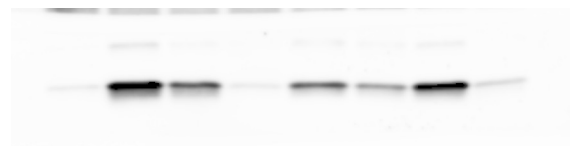

$\gamma$ -H2AX

DU145

Fig. 2B

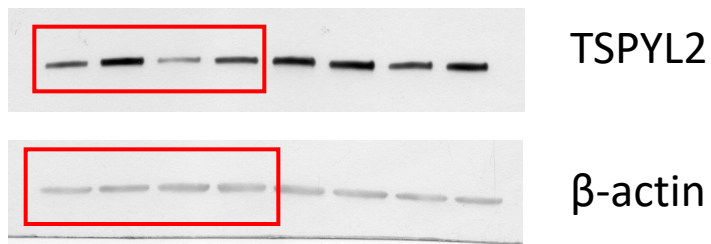

Fig. 3A

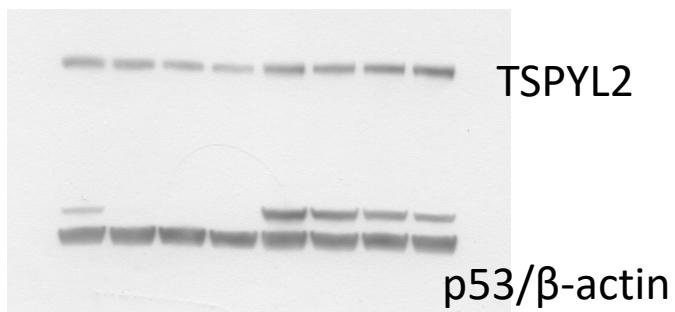

Fig. 3B

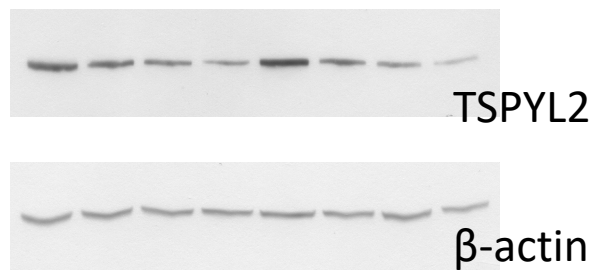

Fig. 3C

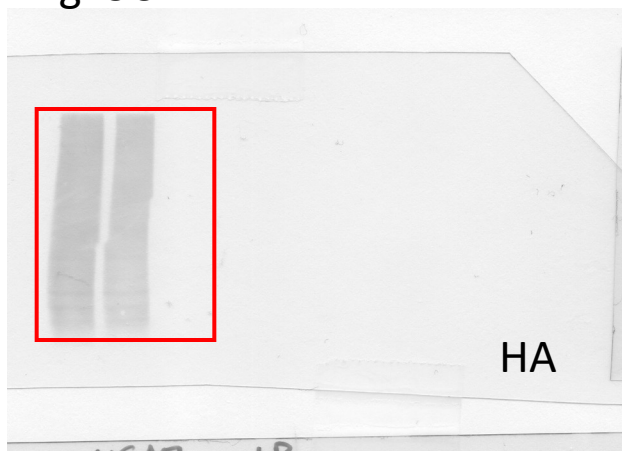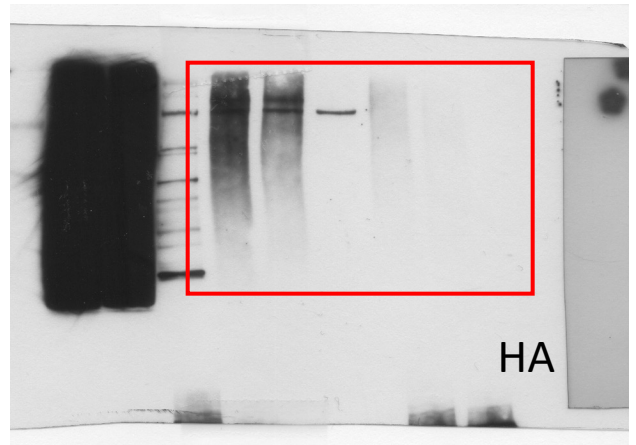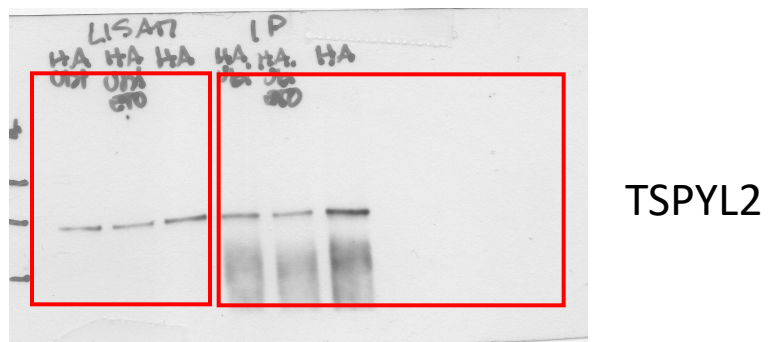

Fig. 3D

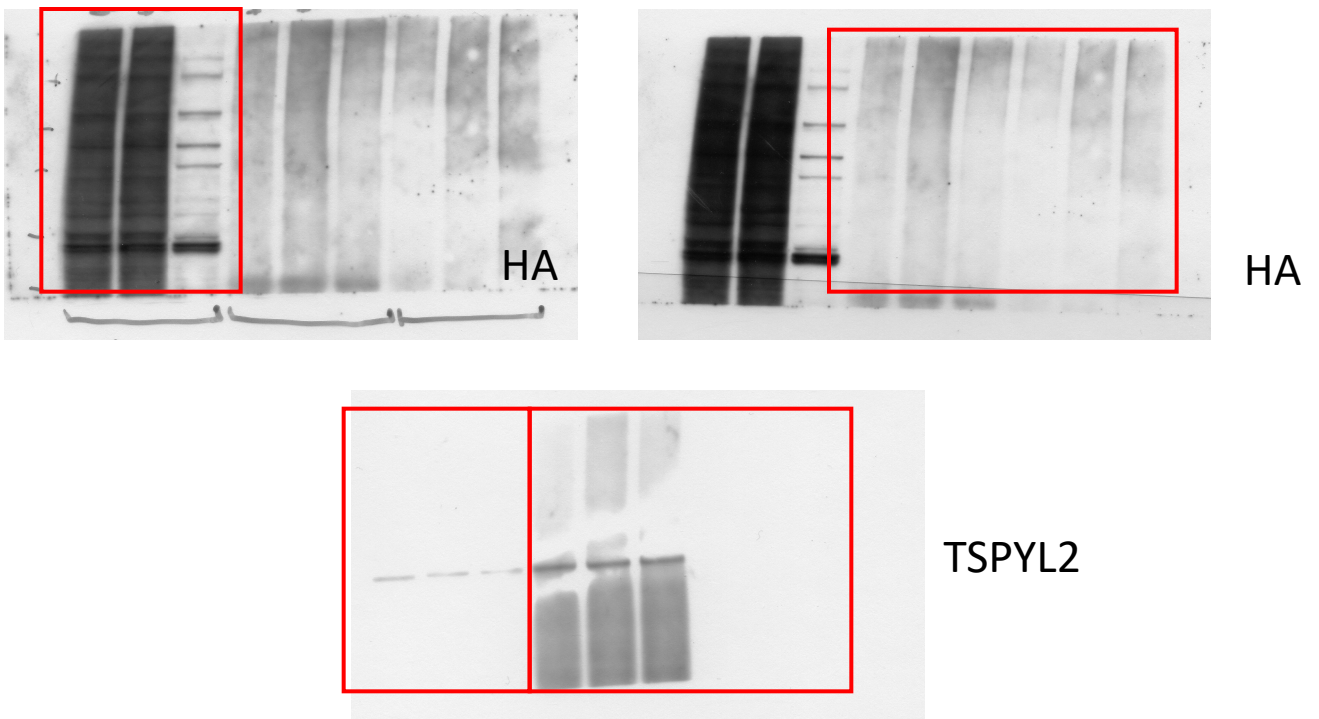

Fig. 3E

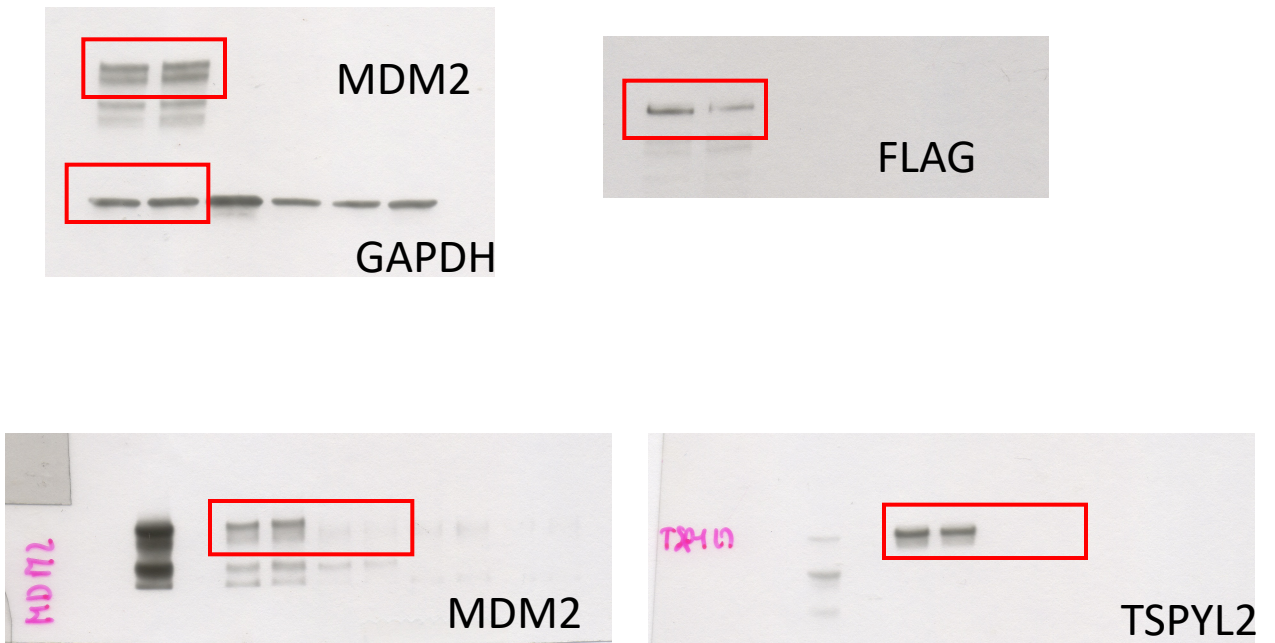

Fig. 3F

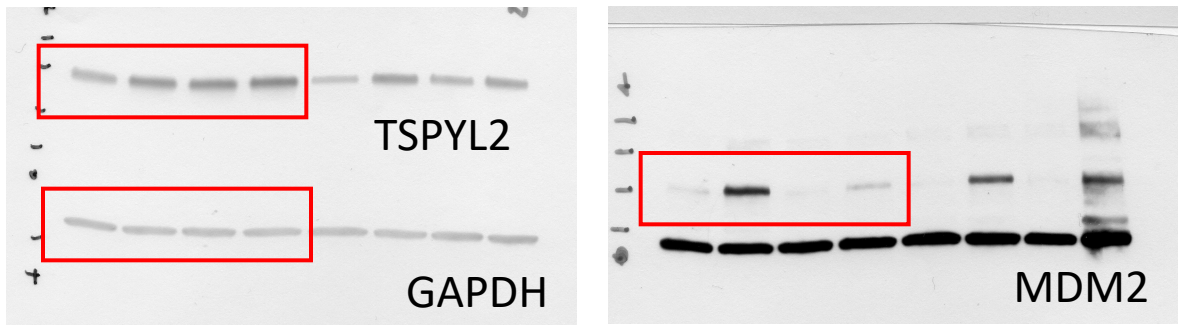

Fig. 3G

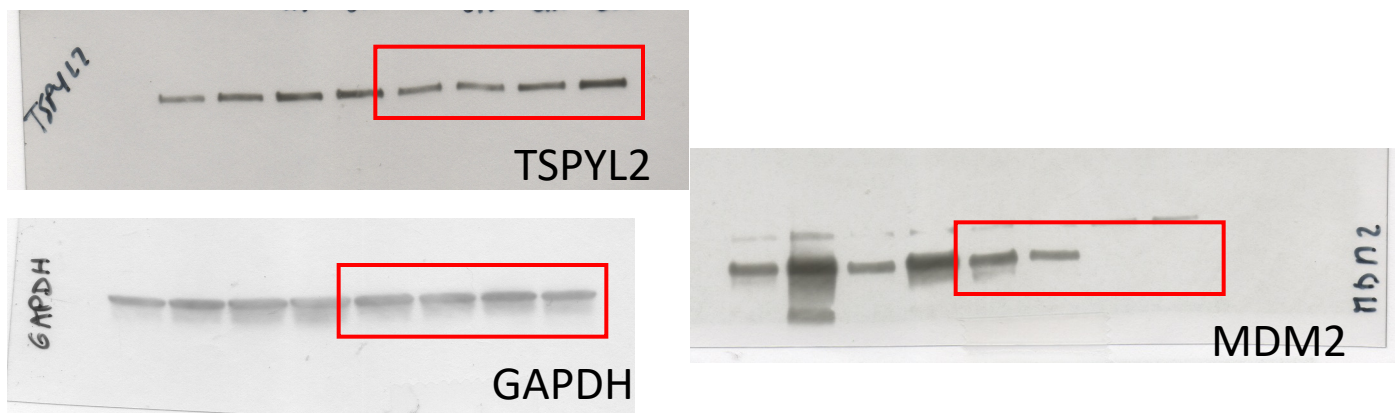

Fig. 3H

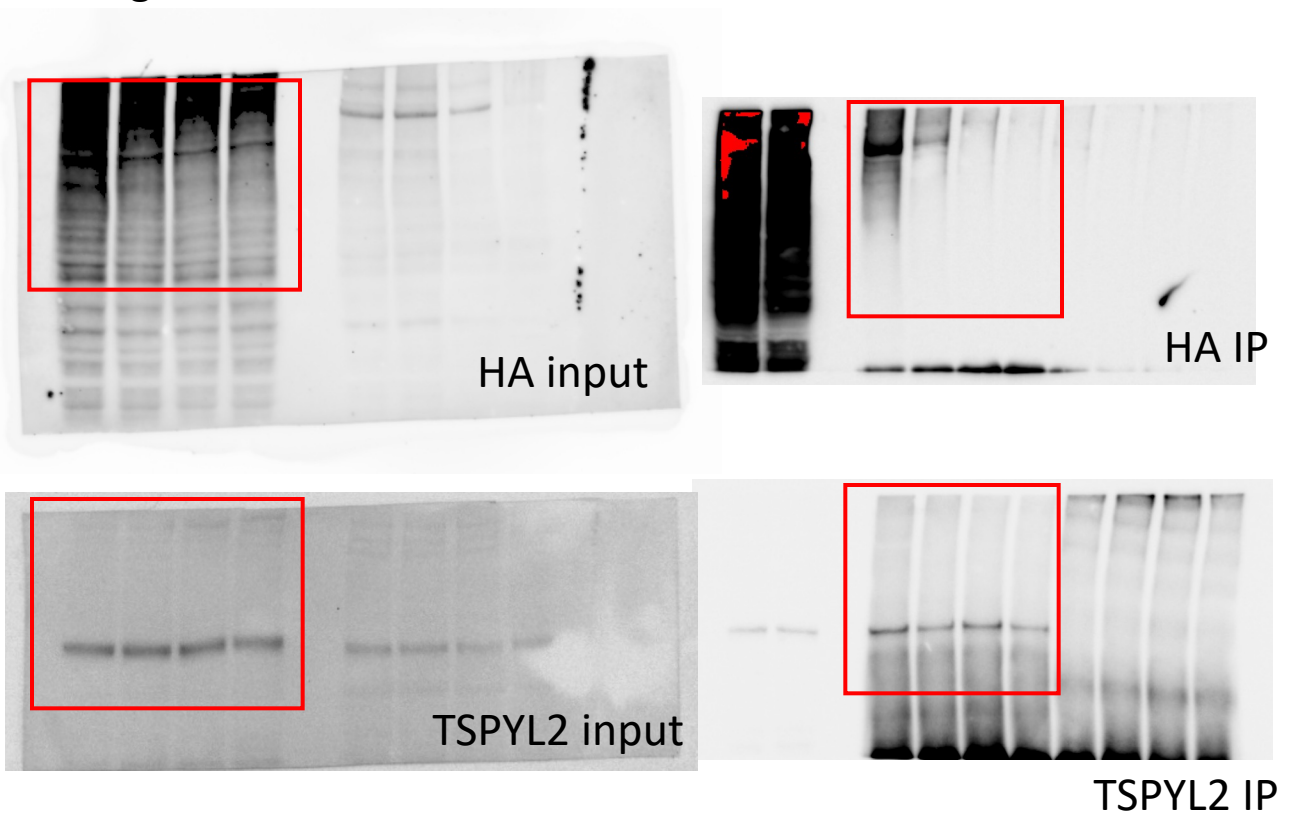



Fig. 3I

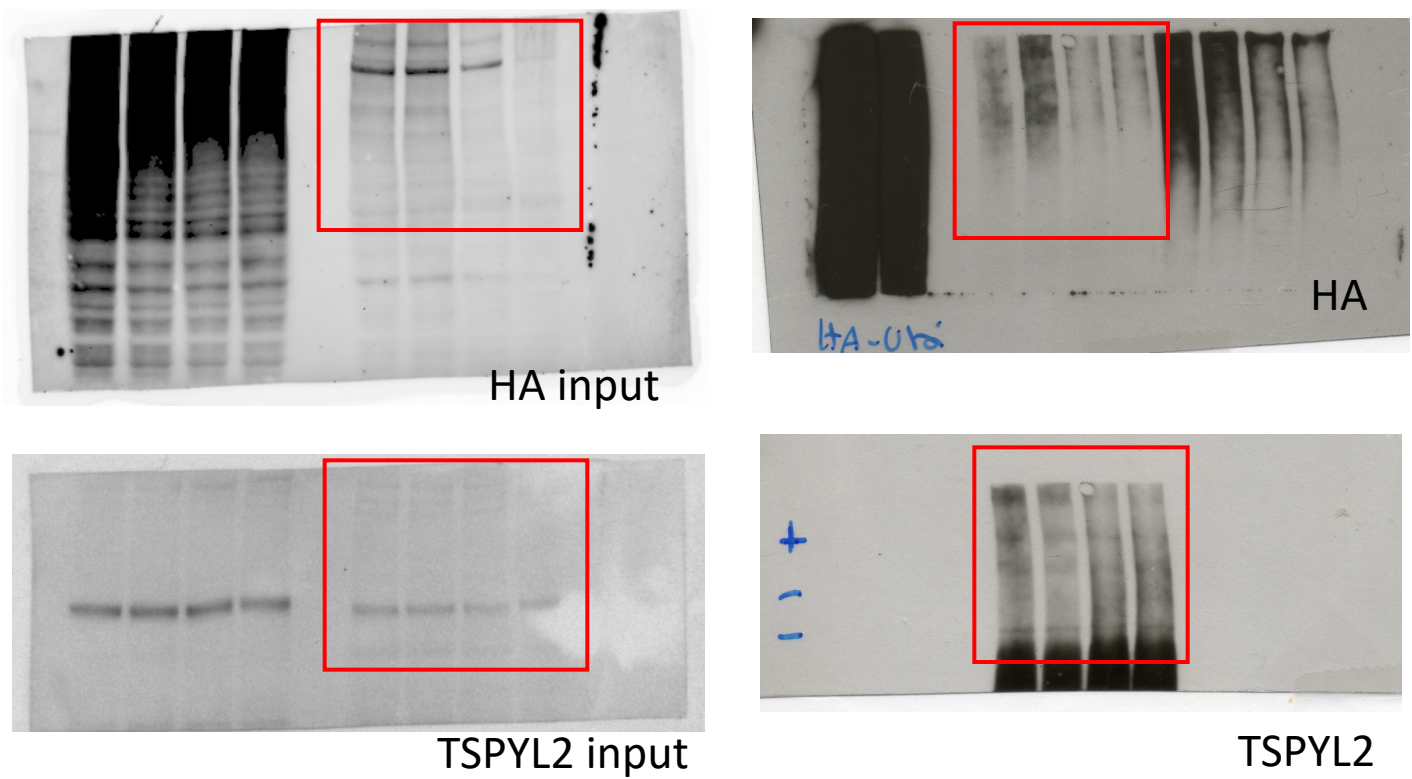

Fig. 4B

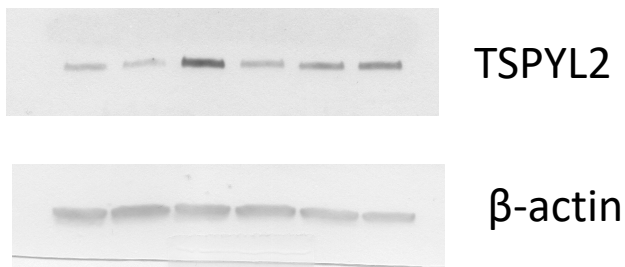

Fig. 4C

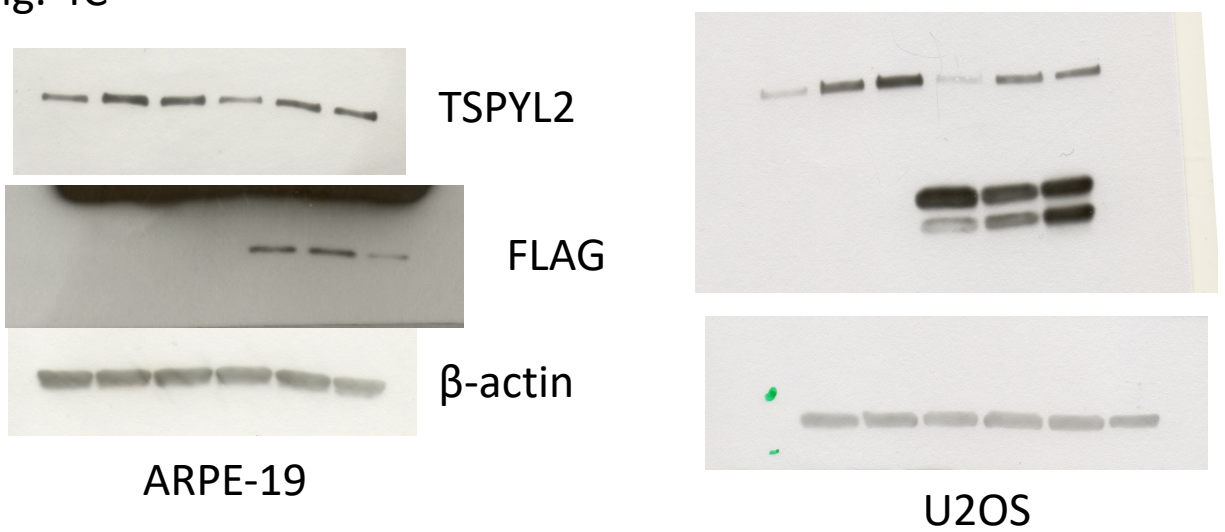

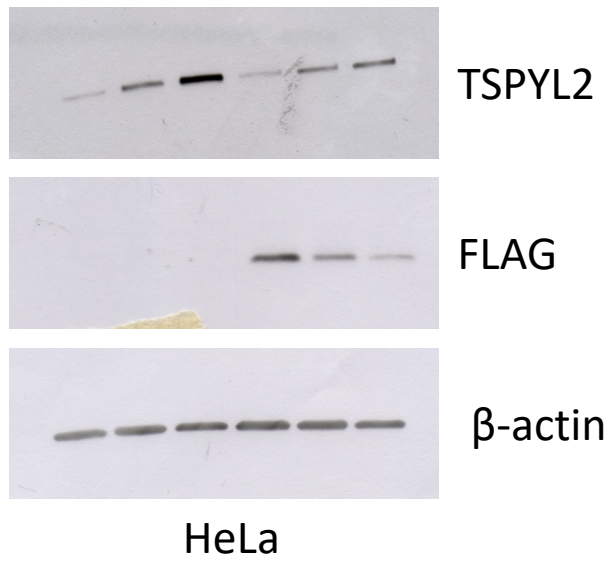

Fig. 4D

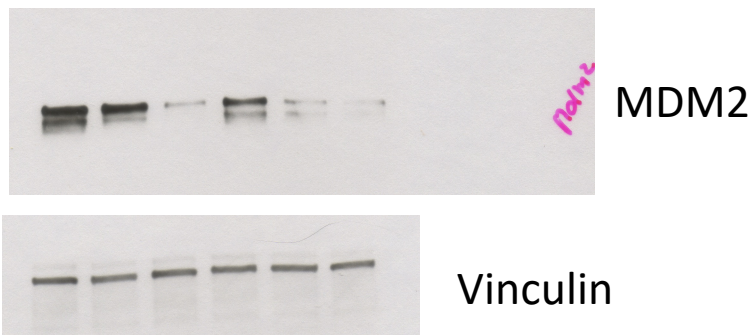

Supplementary Fig. 1A

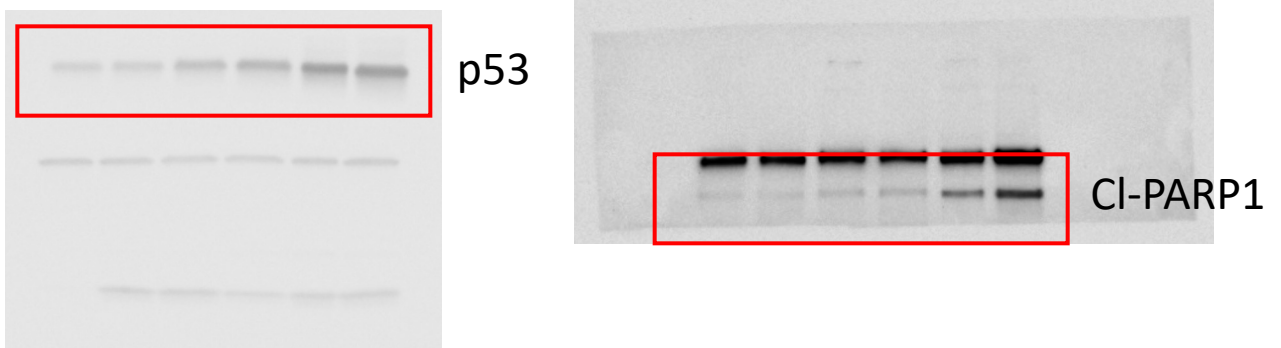

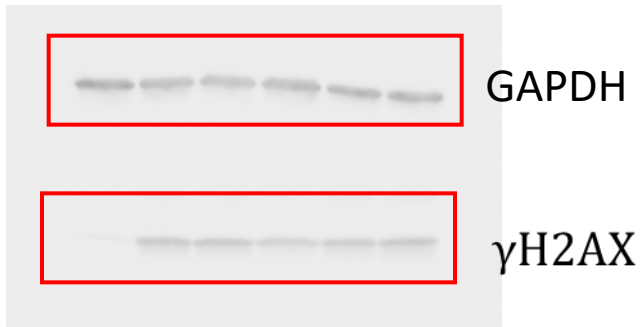

Supplementary Fig. 1E

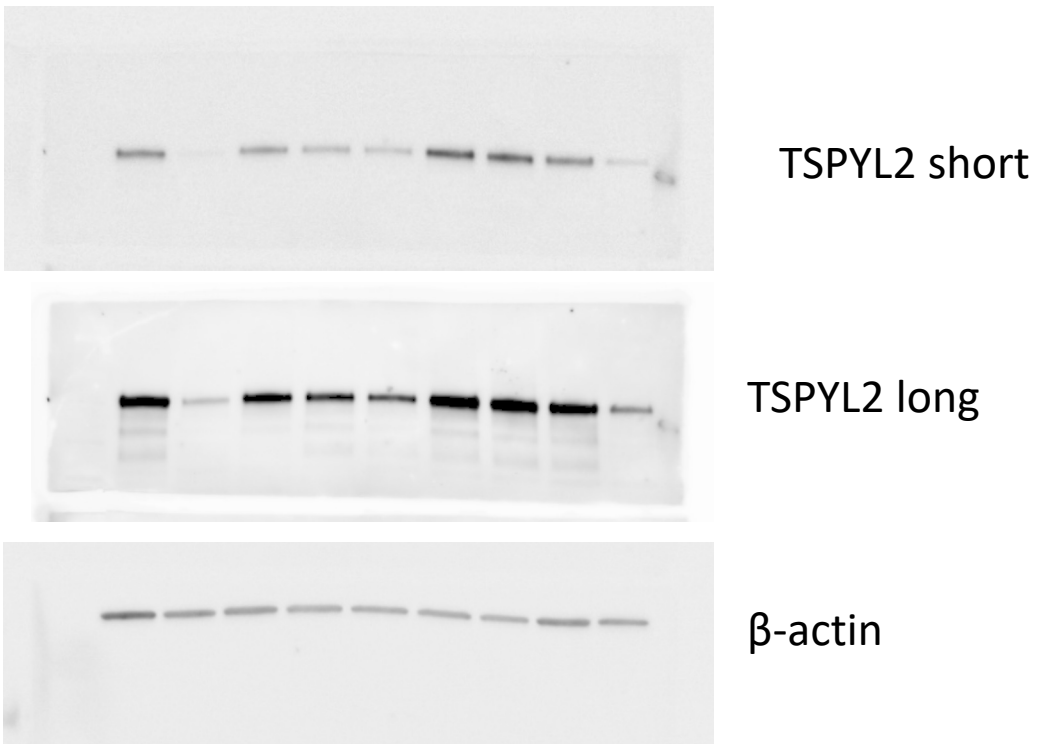

Supplementary Fig. 2C

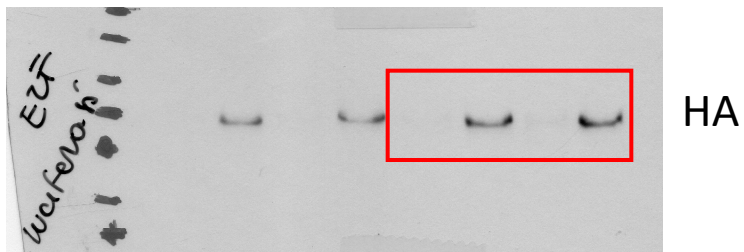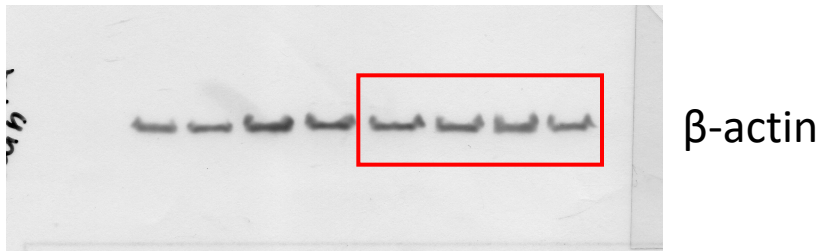

Supplementary Fig. 3

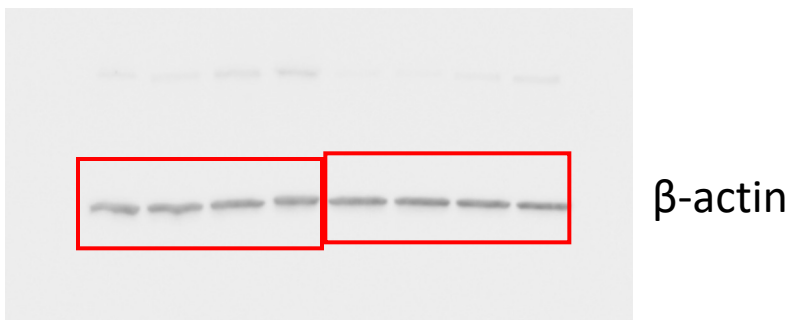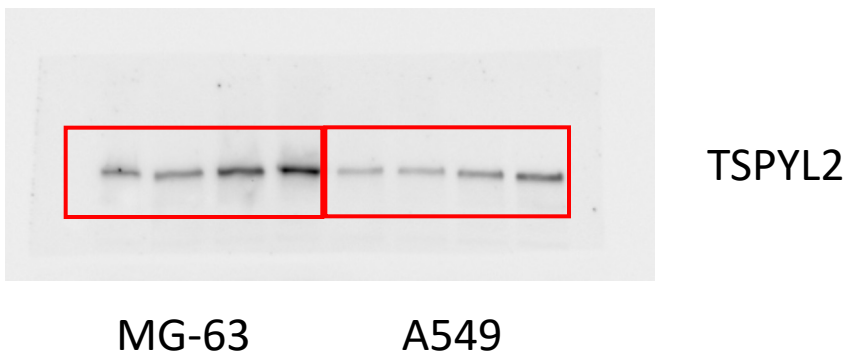

Supplementary Fig. 4

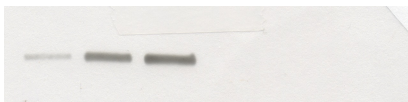

TSPYL2

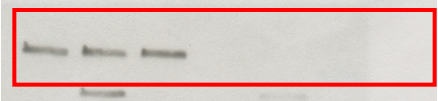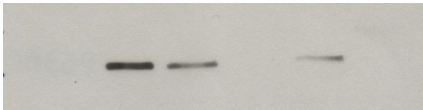

Ct. PARP-1

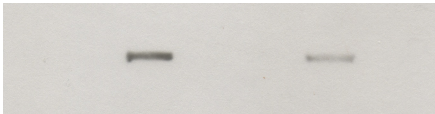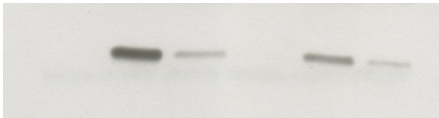

p53 Ac-K382

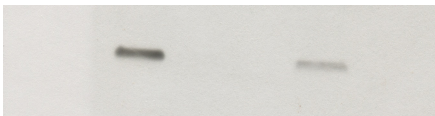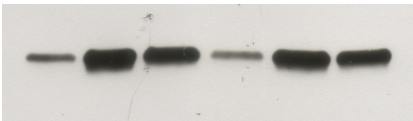

p53

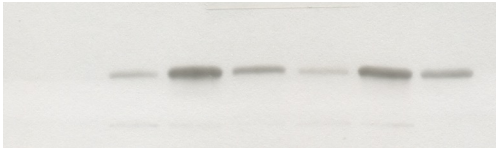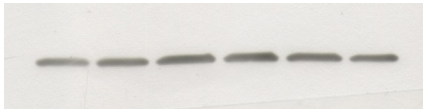

GAPDH

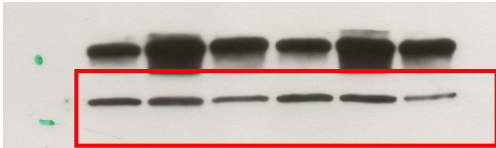

U2OS

A549
